# Supplementary material for: Polycyclic aromatic hydrocarbon concentrations and potential health risks in chicken doner kebabs cooked with different fat contents and cooking methods
Source: Research Square preprint supplement (doi:10.21203/rs.3.rs-2757925/v1), 2023-04-28
Supplement: Supplementary file 1 [file ad1831b24a6dd53925718e38.docx]

**Supplementary Information**

**For**

**Polycyclic aromatic hydrocarbon concentrations and potential health risks in chicken doner kebabs cooked with different fat contents and cooking methods**

**Betül Karslıoğlu1*, Nuray Kolsarıcı2**

1* Hasan Kalyoncu University, Faculty Of Fine Arts & Archıtecture, Department of Gastronomy and Culinary Arts, Gaziantep, Turkey

2Ankara University, Faculty of Engineering, Department of Food Engineering, Ankara, Turkey

***Corresponding Author:**

Betül KARSLIOĞLU

E-mail: betul.kokay@hku.edu.tr

Full postal address: Hasan Kalyoncu University, Faculty Of Fine Arts & Archıtecture, Department of Gastronomy and Culinary Arts, Gaziantep, Turkey

Telephone: +90 (342) 211 80 80

Nuray KOLSARICI

E-mail: [kolsari@eng.ankara.edu.tr](mailto:kolsari@eng.ankara.edu.tr)

Telephone: +90 312 203 33 00/ 3646

- 1. ***Chemicals and standards***

15+1 EU PAH standards are composed of benzo[c]fluorene, cyclopenta[cd]pyrene, benzo[a]anthracene, chrysene, 5-methychrysene, benzo(j)fluoranthene, benzo[a]pyrene, benzo[b]fluoranthene, benzo[k]fluoranthene, dibenzo[a,l]pyrene, dibenzo[a,h]anthracene, benzo[ghi]perylene, ındeno[1,2,3-cd]pyrene, dibenzo[a,e]pyrene, dibenzo(a,i)pyrene and dibenzo(a,h)pyrene compounds.

- 1. ***Sample preparation***

The temperature of the chicken doner kebab sample surface was measured from multiple points by using Fluke Ti105 infrared camera (Fluke Thermography, Plymouth, MN). Cooking time was designed as 120 seconds for medium and 165 seconds for well-done cooked samples after the surface temperature reached to 115±5°C and 130±5°C, respectively. After the cooked slices are collected in two packages for each treatment, they were transported to the laboratory to perform analysis. These parameters were determined according to our preliminary experiment. In this context, twelve different groups were obtained. The collected samples were packaged individually and transported to the Meat Science and Technology Laboratory. Each sample was homogenized using a kitchen blender (Tefal Smart, France) to produce a uniform sample for analyses. The chicken doner kebab production process was replicated three times to provide the validation of the results and the repeatability of the process.
